# Supplementary material for: Aggregation-induced emission luminogen with excellent triplet–triplet upconversion efficiency for highly efficient non-doped blue organic light-emitting diodes
Source: Royal Society of Chemistry journal article supplement (doi:10.1039/d1mh01129d), 2021-08-27
Supplement: d1mh01129d1.pdf [file d1mh01129d1.pdf]

## Electronic Supplementary Information

### **Aggregation-Induced Emission Luminogen with Excellent Triplet-Triplet Upconversion Efficiency for Highly Efficient Non-Doped Blue Organic Light-Emitting Diode**

Pengbo Han,<sup>a</sup> Chengwei Lin,<sup>a</sup> Kaojin Wang,<sup>a</sup> Yanping Qiu,<sup>a</sup> Haozhong Wu,<sup>a</sup> Anjun Qin,<sup>a,\*</sup> Dongge Ma,<sup>a,\*</sup> and Ben Zhong Tang<sup>a,b,\*</sup>

<sup>a</sup>. State Key Laboratory of Luminescent Materials and Devices, Guangdong Provincial Key Laboratory of Luminescence from Molecular Aggregates, Center for Aggregation-Induced Emission, South China University of Technology, Guangzhou, Guangdong 510640, China.

<sup>b</sup>. Shenzhen Institute of Molecular Aggregate Science and Engineering, School of Science and Engineering, The Chinese University of Hong Kong, Shenzhen, 2001 Longxiang Boulevard, Longgang District, Shenzhen City, Guangdong 518172, China.

## Materials and Instruments

All the chemicals and reagents were purchased from commercial sources and used as received without further purification.  $^1\text{H}$  and  $^{13}\text{C}$  NMR spectra were measured on a Bruker AV 500 spectrometer in deuterated dichloromethane. High resolution mass spectra (HRMS) were recorded on a GCT premier CAB048 mass spectrometer operating in MALDI-TOF mode. TGA analysis was carried out on a TA TGA Q5000 and DSC analysis was performed on a DSC Q1000 under dry nitrogen at a heating rate of  $10\text{ }^\circ\text{C min}^{-1}$ . UV-vis absorption spectra were measured on a Shimadzu UV-2600 spectrophotometer. Photoluminescence spectra were recorded on a Horiba Fluoromax-4 spectrofluorometer. Fluorescence quantum yields were measured using a Hamamatsu absolute PL quantum yield spectrometer C11347 Quantaurus\_QY. Fluorescence lifetimes were determined with a Hamamatsu C11367-11 Quantaurus-Tau time-resolved spectrometer. The frontier orbitals of the molecules based on the ground state geometries were calculated at B3LYP/6-31G (d,p) by Gaussian 09 program. Cyclic voltammetry (CV) were performed on a CHI 610E A14297 in a solution of tetra-*n*-butylammonium hexafluorophosphate ( $\text{Bu}_4\text{NPF}_6$ ) (0.1 M) in dichloromethane (DCM) or dimethylformamide (DMF) at a scan rate of  $100\text{ mV s}^{-1}$ , using a platinum wire as the auxiliary electrode, a glass carbon disk as the working electrode and  $\text{Ag}/\text{Ag}^+$  as the reference electrode.  $\text{HOMO} = - [E_{\text{ox}} - E_{1/2}(\text{Fc}/\text{Fc}^+) + 4.8]\text{ eV}$ ,  $\text{LUMO} = - [E_{\text{red}} - E_{1/2}(\text{Fc}/\text{Fc}^+) + 4.8]\text{ eV}$ , where  $E_{\text{ox}}$  and  $E_{\text{red}}$  represent the onset oxidation potential and the reduction potential relative to  $\text{Fc}/\text{Fc}^+$  (4.8 eV), respectively, and  $E_{1/2}(\text{Fc}/\text{Fc}^+)$  represents the calibrated value.

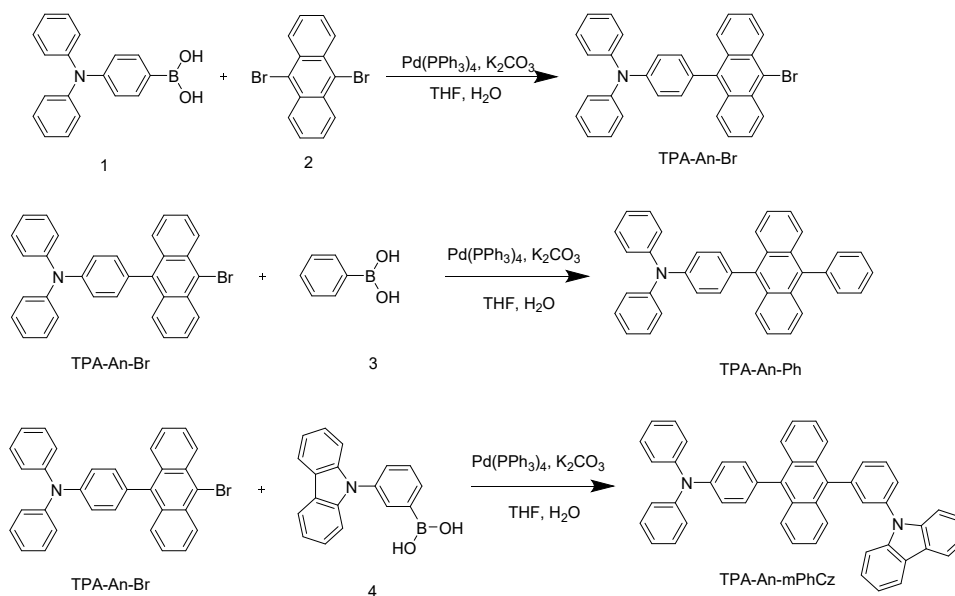

**Scheme S1** Synthetic routes to TPA-An-Ph and TPA-An-mPhCz.

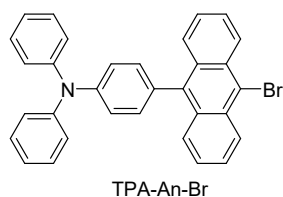

#### Synthesis of 4-(10-bromoanthracen-9-yl)-N,N-diphenylaniline (TPA-An-Br)

Compound **1** (500 mg, 1.73 mmol), compound **2** (400 mg, 1.19 mmol), anhydrous potassium carbonate (492 mg, 3.57 mmol) and Pd(PPh<sub>3</sub>)<sub>4</sub> (69 mg, 0.06 mmol) were added into a 100 ml two neck round bottom flask under N<sub>2</sub>, then tetrahydrofuran (THF, 6 mL) and water (1 mL) was injected into the flask. The reaction solution was stirred at 74 °C for 6 h. After cooling to room temperature, the solution was poured into water and extracted with DCM for three times, and then organic phase was combined and dried over anhydrous magnesium sulfate. After filtration, the organic phase was concentrated by a rotary evaporator under reduced pressure, and the residue was purified by a silica gel column chromatography using PE/DCM (1:1 v/v) as eluent.

Yellow solid of TPA-An-Br was obtained in 81.0% (482 mg).  $^1\text{H}$  NMR (500 MHz,  $\text{CD}_2\text{Cl}_2$ ),  $\delta$  (TMS, ppm): 9.32 (d, 1H), 8.55 (d, 1H), 8.34 (d, 1H), 8.17 (d, 1H), 8.06 (t, 2H), 7.97 (d, 4H), 7.87 (t, 1H).  $^{13}\text{C}$  NMR (125 MHz,  $\text{CD}_2\text{Cl}_2$ ),  $\delta$  (TMS, ppm): 149.04, 148.81, 139.21, 133.23, 133.07, 132.54, 131.56, 130.68, 128.95, 128.81, 128.35, 126.81, 125.97, 124.49, 124.36, 123.51.

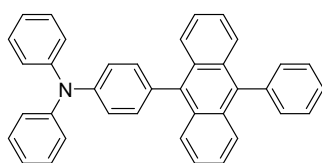

TPA-An-Ph

Synthesis of *N,N*-diphenyl-4-(10-phenylanthracen-9-yl)aniline (TPA-An-Ph)

TPA-An-Ph was obtained according previous work.<sup>1</sup>  $^1\text{H}$  NMR (500 MHz,  $\text{CD}_2\text{Cl}_2$ ),  $\delta$  (TMS, ppm): 7.84 (d, 2H), 7.61 (d, 2H), 7.58-7.54 (m, 3H), 7.46 (2H, d), 7.36-7.25 (16H, m), 7.08 (m, 2H).  $^{13}\text{C}$  NMR (125 MHz,  $\text{CD}_2\text{Cl}_2$ ),  $\delta$  (TMS, ppm): 148.63, 148.04, 139.83, 137.18, 133.48, 132.88, 132.05, 130.14, 129.20, 127.76, 127.66, 125.34, 124.11, 123.83. HRMS ( $\text{C}_{38}\text{H}_{27}\text{N}$ ):  $m/z$  497.2137 ( $\text{M}^+$ , calcd 497.2143).

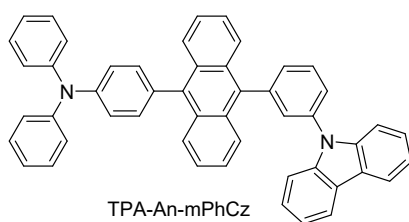

TPA-An-mPhCz

Synthesis of 4-(10-(3-(9H-carbazol-9-yl)phenyl)anthracen-9-yl)-*N,N*-diphenylaniline (TPA-An-mPhCz)

TPA-An-mPhCz was synthesized by similar procedures as TPA-An-Br from the reagents of **4** and TPA-An-Br in 86% yield.  $^1\text{H}$  NMR (500 MHz,  $\text{CD}_2\text{Cl}_2$ ),  $\delta$  (TMS, ppm): 8.15 (d, 2H), 7.85-7.72 (m, 5H), 7.73 (t, 1H), 7.60 (m, 3H), 7.42 (m, 6H), 7.34-

7.26 (d, 13H), 7.09 (d, 2H).  $^{13}\text{C}$  NMR (125 MHz,  $\text{CD}_2\text{Cl}_2$ ),  $\delta$  (TMS, ppm): 149.14, 148.63, 142.35, 142.05, 139.23, 138.83, 136.94, 133.39, 133.37, 131.60, 131.41, 131.34, 131.22, 130.87, 130.67, 128.46, 127.91, 127.32, 126.75, 126.38, 125.90, 124.75, 124.60, 124.59, 124.39, 121.54, 121.35, 111.16. HRMS ( $\text{C}_{49}\text{H}_{34}\text{N}_2$ ):  $m/z$  662.2729 ( $\text{M}^+$ , calcd 662.2722).

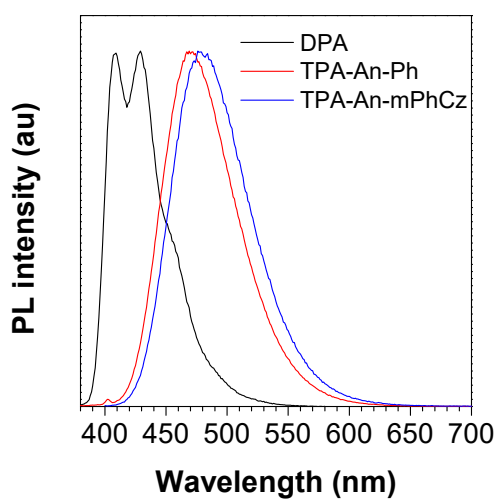

**Fig. S1.** PL spectra of DPA, TPA-An-Ph and TPA-An-mPhCz in THF solutions.  $\lambda_{\text{ex}}$ : 360 nm; concentration: 10  $\mu\text{M}$ .

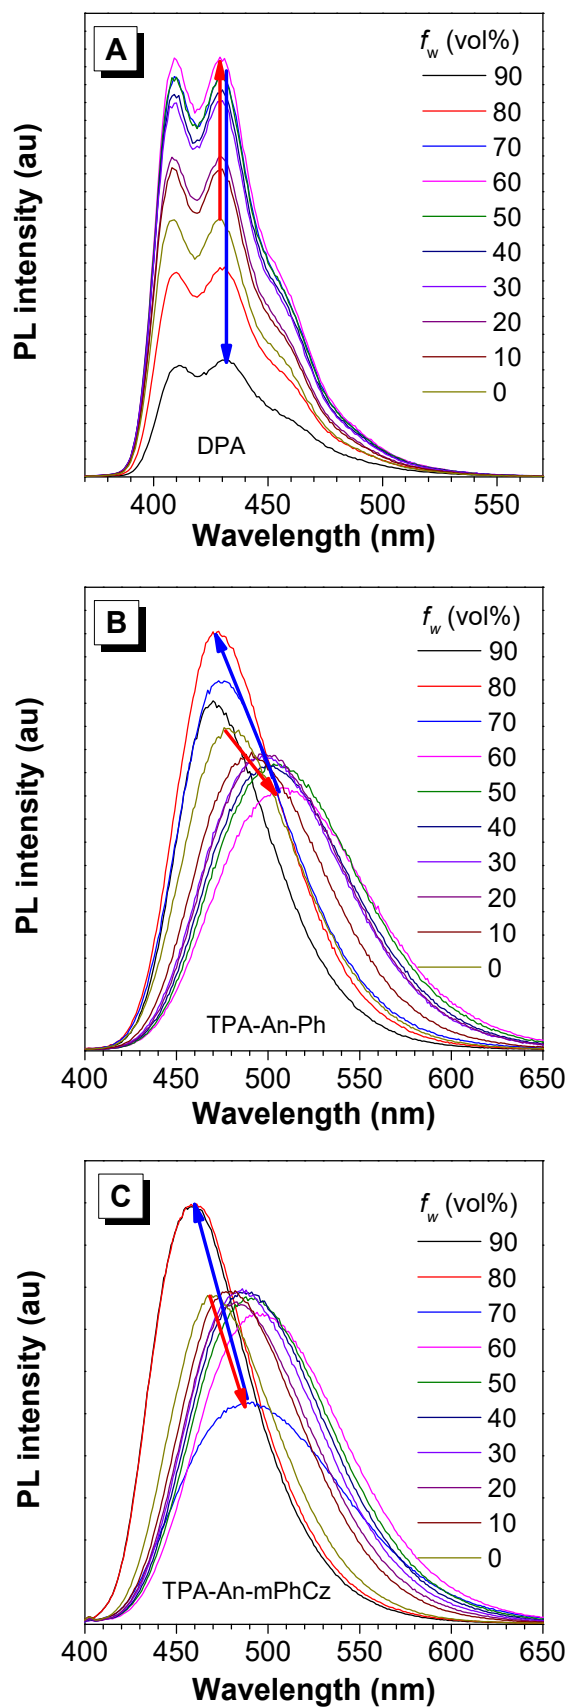

**Fig. S2.** PL spectra of (A) DPA, (B) TPA-An-Ph and (C) TPA-An-mPhCz in THF/water mixtures with different water fractions.  $\lambda_{\text{ex}}$ : 360 nm; concentration: 10  $\mu\text{M}$ .

**Table S1.** Detailed absorption and emission peaks of DPA in different solvents

| solvents        | $\epsilon$ | $n$   | $f(\epsilon, n)$ | $\lambda_a$ [nm] | $\lambda_r$ [nm] | $\nu_a-\nu_r$ [cm <sup>-1</sup> ] |
|-----------------|------------|-------|------------------|------------------|------------------|-----------------------------------|
| hexane          | 1.90       | 1.375 | 0                | 392              | 406              | 880                               |
| toulene         | 2.40       | 1.497 | 0.013            | 395              | 409              | 867                               |
| triethylamine   | 2.42       | 1.401 | 0.048            | 392              | 406              | 880                               |
| isopropyl ether | 3.88       | 1.386 | 0.145            | 392              | 405              | 819                               |
| chloroform      | 4.80       | 1.446 | 0.148            | 396              | 411              | 921                               |
| ethyl acetate   | 5.10       | 1.372 | 0.200            | 392              | 406              | 880                               |
| tetrahydrofuran | 7.58       | 1.407 | 0.210            | 395              | 409              | 867                               |
| dichloromethane | 8.93       | 1.424 | 0.217            | 395              | 410              | 926                               |

**Table S2.** Detailed absorption and emission peaks of TPA-An-Ph in different solvents

| solvents        | $\epsilon$ | $n$   | $f(\epsilon, n)$ | $\lambda_a$ [nm] | $\lambda_r$ [nm] | $\nu_a-\nu_r$ [cm <sup>-1</sup> ] |
|-----------------|------------|-------|------------------|------------------|------------------|-----------------------------------|
| hexane          | 1.90       | 1.375 | 0                | 393              | 433              | 2350                              |
| toulene         | 2.40       | 1.497 | 0.013            | 396              | 449              | 2981                              |
| triethylamine   | 2.42       | 1.401 | 0.048            | 394              | 440              | 2653                              |
| isopropyl ether | 3.88       | 1.386 | 0.145            | 393              | 449              | 3174                              |
| chloroform      | 4.80       | 1.446 | 0.148            | 397              | 460              | 3450                              |
| ethyl acetate   | 5.10       | 1.372 | 0.200            | 394              | 468              | 4013                              |
| tetrahydrofuran | 7.58       | 1.407 | 0.210            | 395              | 469              | 3995                              |
| dichloromethane | 8.93       | 1.424 | 0.217            | 396              | 494              | 5010                              |

**Table S3.** Detailed absorption and emission peaks of TPA-An-mPhCz in different solvents

| solvents        | $\epsilon$ | $n$   | $f(\epsilon, n)$ | $\lambda_a$ [nm] | $\lambda_r$ [nm] | $\nu_a-\nu_r$ [cm <sup>-1</sup> ] |
|-----------------|------------|-------|------------------|------------------|------------------|-----------------------------------|
| hexane          | 1.90       | 1.375 | 0                | 393              | 437              | 2562                              |
| toulene         | 2.40       | 1.497 | 0.013            | 397              | 456              | 3259                              |
| triethylamine   | 2.42       | 1.401 | 0.048            | 395              | 448              | 3124                              |
| isopropyl ether | 3.88       | 1.386 | 0.145            | 393              | 453              | 3370                              |
| chloroform      | 4.80       | 1.446 | 0.148            | 397              | 476              | 4181                              |
| ethyl acetate   | 5.10       | 1.372 | 0.200            | 394              | 472              | 4194                              |
| tetrahydrofuran | 7.58       | 1.407 | 0.210            | 396              | 476              | 4244                              |
| dichloromethane | 8.93       | 1.424 | 0.217            | 397              | 496              | 5028                              |

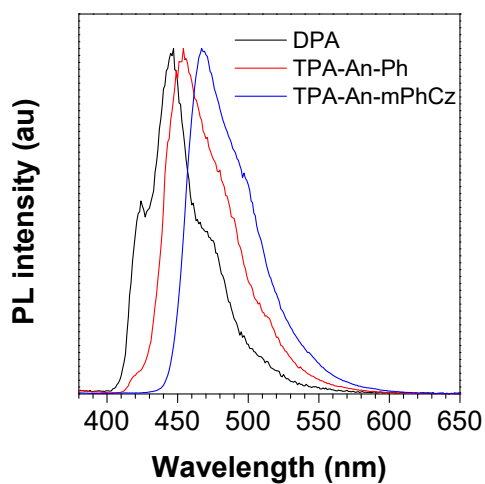

**Fig. S3.** PL spectra of the films of DPA, TPA-An-Ph and TPA-An-mPhCz at 77 K.  $\lambda_{\text{ex}}$ : 360 nm.

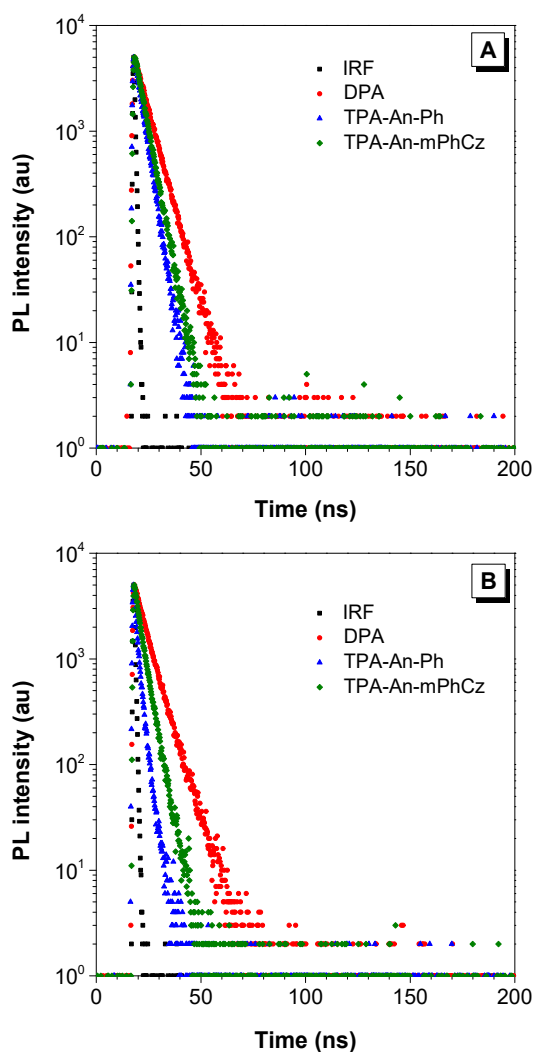

**Fig. S4.** PL lifetime decays of DPA, TPA-An-Ph and TPA-An-mPhCz (A) in THF solutions (concentration: 10  $\mu\text{M}$ ) and (B) film state.  $\lambda_{\text{ex}}$ : 360 nm.



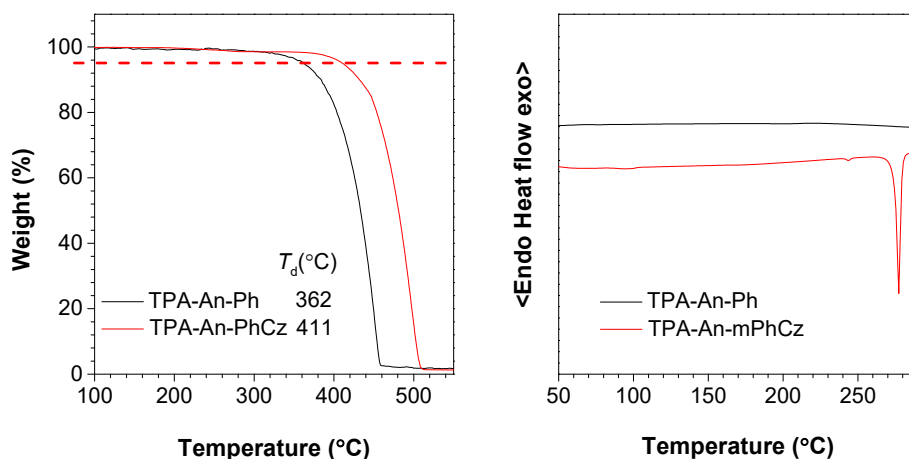

**Fig. S5.** TGA thermograms (left) and DSC curve (right) of TPA-An-Ph and TPA-An-mPhCz, recorded under nitrogen at a heating rate of 10 °C/min.

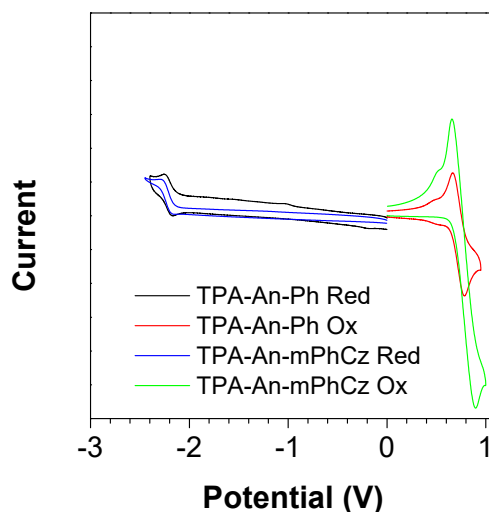

**Fig. S6.** Cyclic voltammograms of TPA-An-Ph and TPA-An-mPhCz, measured in dichloromethane containing 0.1 M tetra-*n*-butylammonium hexafluorophosphate.

**Table S4.** Photophysical, thermal and electronic properties of TPA-An-Ph and TPA-An-mPhCz

| compounds    | $\lambda_{\text{abs}}^{\text{a)}$ [nm] | $\lambda_{\text{PL}}$ [nm]            | $\Phi_{\text{PL}}^{\text{c)}$ [%]     | $\tau^{\text{d)}$ [ns]                | $T_{\text{d}}$ [°C] | $T_{\text{g}}$ [°C] | HOMO/LUMO <sup>e)</sup><br>[eV] |
|--------------|----------------------------------------|---------------------------------------|---------------------------------------|---------------------------------------|---------------------|---------------------|---------------------------------|
|              | sol                                    | sol <sup>a)</sup> /film <sup>b)</sup> | sol <sup>a)</sup> /film <sup>b)</sup> | sol <sup>a)</sup> /film <sup>b)</sup> |                     |                     |                                 |
| TPA-An-Ph    | 360                                    | 469/460                               | 30.0/40.1                             | 3.45/1.95                             | 362                 | -                   | -5.20/-2.51                     |
| TPA-An-mPhCz | 360                                    | 478/470                               | 57.8/65.1                             | 3.85/3.58                             | 411                 | -                   | -5.22/-2.52                     |

<sup>a)</sup> Measured in oxygen-free THF solution at room temperature ( $10^{-5}$  M). <sup>b)</sup> Measured in thin film. <sup>c)</sup> The absolute PL quantum yield. <sup>d)</sup> PL lifetimes at room temperature under air conditions. <sup>e)</sup> Measured by cyclic voltammetry.

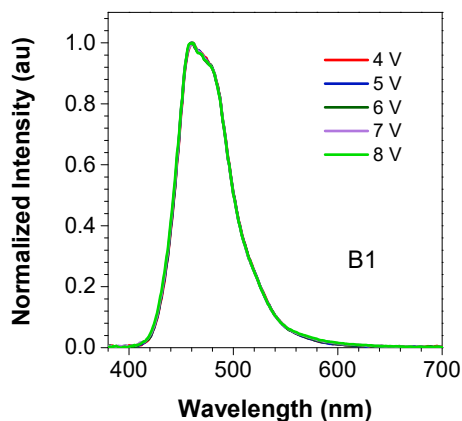

**Fig. S7.** Electroluminescence (EL) spectra of device B1 at various voltages.

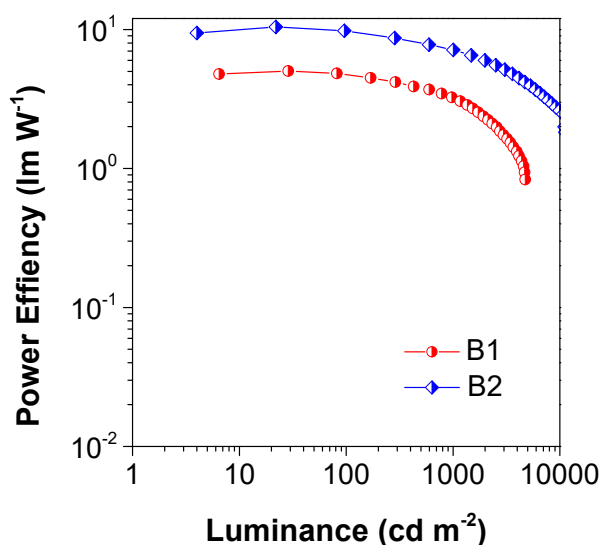

**Fig. S8.** Power efficiency versus luminance curves of the non-doped OLEDs using TPA-An-Ph and TPA-An-mPhCz as EMLs.

**Table S5.** EL performance of TPA-An-Ph and TPA-An-mPhCz based non-doped devices

| device | $V_{\text{on}}(\text{V})$ | $L_{\text{max}}(\text{cd/m}^2)$ | $\text{CE}^{\text{a}}(\text{cd/A})$ | $\text{PE}^{\text{a}}(\text{lm/W})$ | $\text{EQE}^{\text{a}}(\%)$ | $\lambda_{\text{max}}^{\text{b}}(\text{nm})$ | $\text{CIE}(x, y)^{\text{b}}$ |
|--------|---------------------------|---------------------------------|-------------------------------------|-------------------------------------|-----------------------------|----------------------------------------------|-------------------------------|
| B1     | 3.2                       | 4737                            | 5.54/4.86                           | 5.02/3.05                           | 4.51/4.02                   | 460                                          | (0.14, 0.16)                  |
| B2     | 3.0                       | 13335                           | 10.62/9.09                          | 10.42/7.14                          | 8.10/6.97                   | 470                                          | (0.14, 0.17)                  |

<sup>a)</sup> Order of maximum, then values at 1000  $\text{cd m}^{-2}$ ; <sup>b)</sup> Measured at 1000  $\text{cd m}^{-2}$ . Device configuration: ITO/HAT-CN (5 nm)/TAPC (60 nm)/TCTA (5 nm)/EML (20 nm)/TmPyPB (40 nm)/LiF (1 nm)/Al. Devices B1 and B2 refer to the EMLs of TPA-An-Ph and TPA-An-mPhCz, respectively.

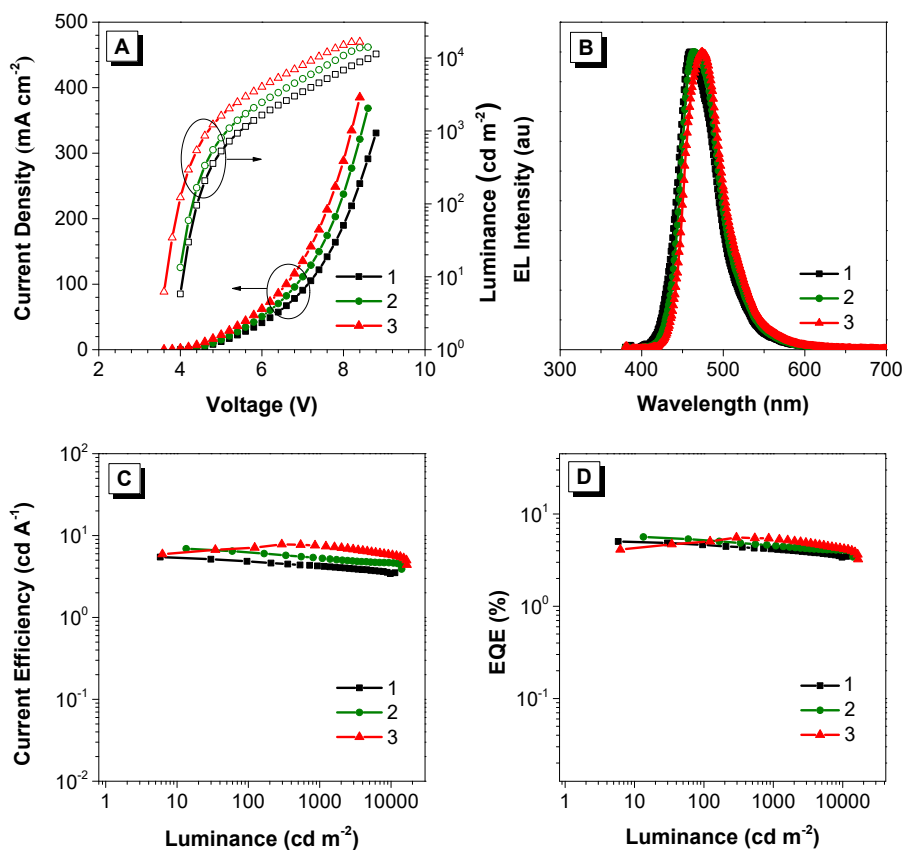

**Fig. S9** (A) Current density-voltage-luminance (J-V-L) characteristics of TPA-An-mPhCz-based doped devices 1-3. (B) Electroluminescence (EL) spectra of TPA-An-mPhCz-based doped devices 1-3. at various voltages. (C) CE and (D) EQE versus luminance curves of t TPA-An-mPhCz-based doped devices 1-3. Device configuration: ITO/HAT-CN (5 nm)/TAPC (60 nm)/TCTA (5 nm)/EML (20 nm)/TmPyPB (40 nm)/LiF (1 nm)/Al; Device 1: EML: 26DCZPPy:TPB-An-mphCz 10%; Device2: EML: 26DCZPPy:TPB-An-mphCz 20%; Device3: EML: 26DCZPPy:TPB-An-mphCz 50%.

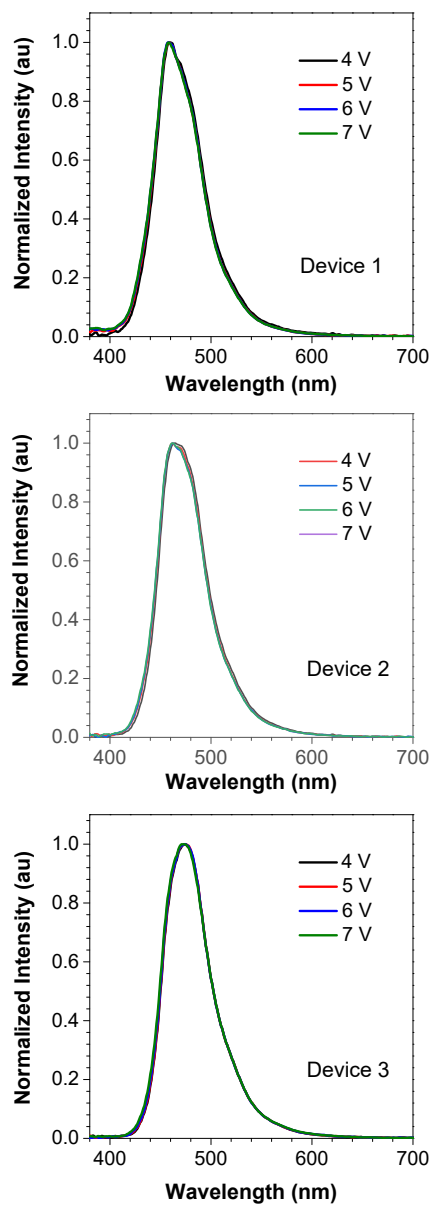

**Fig. S10** EL spectra of TPA-An-mPhCz-based doped devices 1-3 at various voltages.

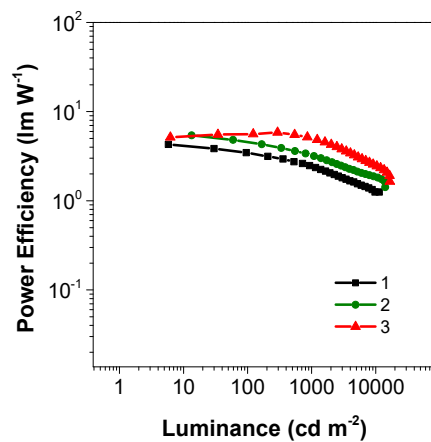

**Fig. S11.** Power efficiency versus luminanc curves of the TPA-An-mPhCz-based doped OLEDs

**Table S6.** EL performance of TPA-An-mPhCz based doped devices

| device | $V_{\text{on}}$ (V) | $L_{\text{max}}$ ( $\text{cd/m}^2$ ) | CE <sup>a)</sup> ( $\text{cd/A}$ ) | PE <sup>a)</sup> ( $\text{lm/W}$ ) | EQE <sup>a)</sup> (%) | $\lambda_{\text{max}}$ <sup>b)</sup> (nm) | CIE (x, y) <sup>b)</sup> |
|--------|---------------------|--------------------------------------|------------------------------------|------------------------------------|-----------------------|-------------------------------------------|--------------------------|
| 1      | 4.0                 | 11363                                | 5.47/4.20                          | 4.29/2.36                          | 5.04/4.13             | 458                                       | (0.14, 0.12)             |
| 2      | 4.0                 | 14092                                | 6.90/5.26                          | 5.42/3.18                          | 5.60/4.50             | 462                                       | (0.14, 0.14)             |
| 3      | 3.8                 | 16692                                | 7.82/7.39                          | 5.85/4.83                          | 5.60/5.30             | 474                                       | (0.14, 0.19)             |

a) Order of maximum, then values at  $1000 \text{ cd m}^{-2}$ ; b) Measured at  $1000 \text{ cd m}^{-2}$ . Device configuration: ITO/HAT-CN (5 nm)/TAPC (60 nm)/TCTA (5 nm)/EML (20 nm)/TmPyPB (40 nm)/LiF (1 nm)/Al; Device 1: EML: 26DCZ:TPB-An-mphCz 10%; Device2: EML: 26DCZ:TPB-An-mphCz 20%; Device3: EML: 26DCZ:TPB-An-mphCz 50%.

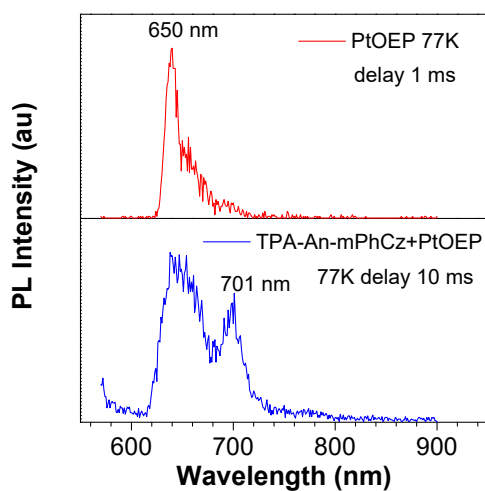

**Fig. S12.** Upper: the phosphorescence of Platinum octaethylporphyrin (PtOEP) in THF at 77 K, excited by 550 nm; lower: the phosphorescence of TPA-An-mPhCz in THF at 77 K, excited by 550 nm, measured in a mixture of PtOEP ( $10^{-4} \text{ M}$ ) + TPA-An-mPhCz ( $10^{-4} \text{ M}$ ) in THF.

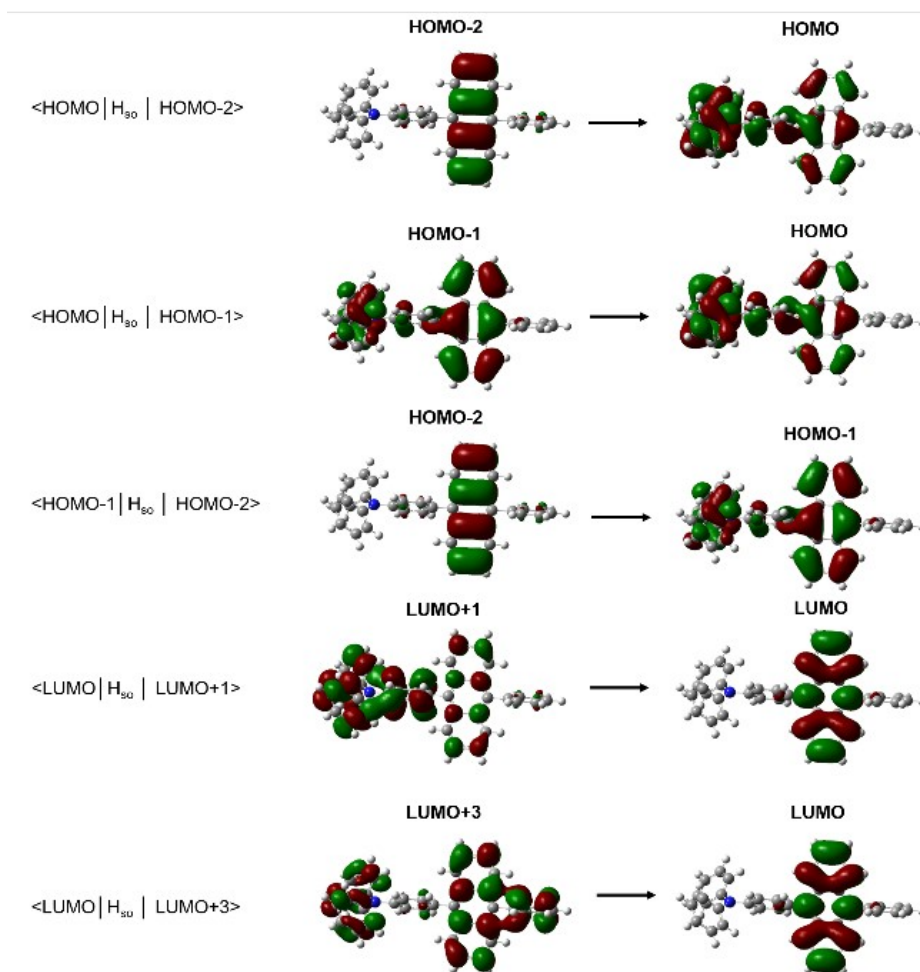

**Fig. S13.** Possible TTU transitions of TPA-An-Ph. Molecular orbitals related to TTU transitions from  ${}^3(\text{TT})$  to  $S_n$  in TPA-An-Ph.

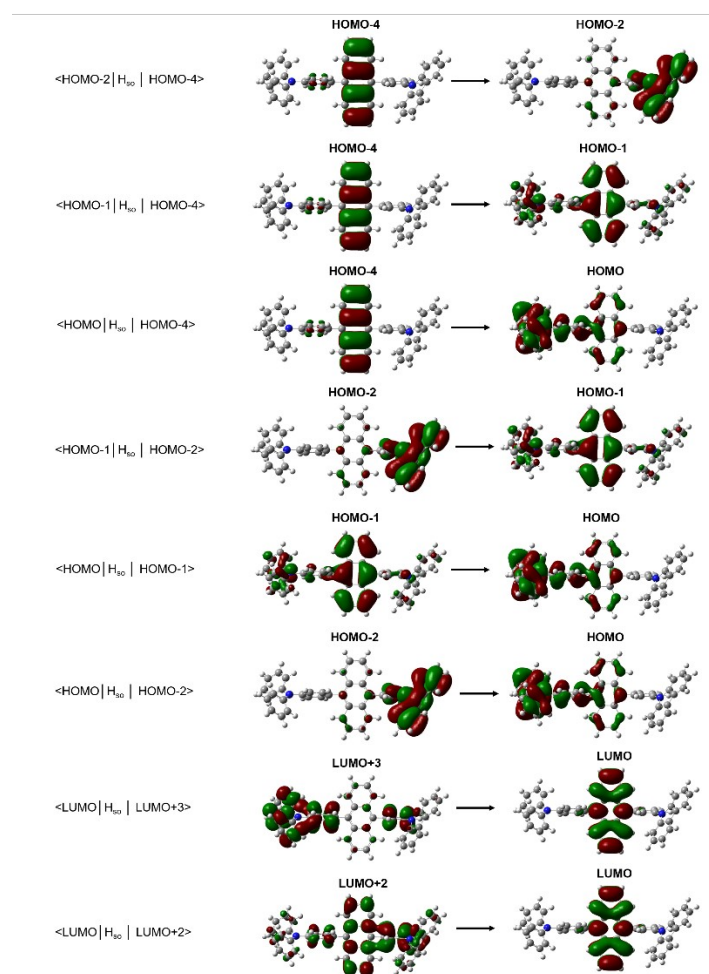

**Fig. S14.** Possible TTU transitions of TPA-An-mPhCz. Molecular orbitals related to TTU transitions from  $^3(\text{TT})$  to  $S_n$  in TPA-An-mPhCz.

**Table S7.** Electronic transitions calculated by B3LYP/6-311G(d,p) of  $S_n$  with energies lower than twice the  $T_1$  energy ( $\sim 3.46$  eV) and  $T_m$  with energies in the range of 3.4-3.50 eV

| compounds    | state    | energy (eV)                 | transition                | percentage contribution (%) |       |
|--------------|----------|-----------------------------|---------------------------|-----------------------------|-------|
| TPA-An-Ph    | $S_1$    | 2.8923                      | HOMO $\rightarrow$ LUMO   | 96.77                       |       |
|              | $S_2$    | 3.1209                      | HOMO-1 $\rightarrow$ LUMO | 95.75                       |       |
|              | $T_7$    | 3.4232                      | HOMO-2 $\rightarrow$ LUMO | 36.22                       |       |
|              |          |                             |                           | HOMO-1 $\rightarrow$ LUMO+1 | 24.15 |
|              |          |                             |                           | HOMO-1 $\rightarrow$ LUMO+3 | 10.67 |
|              |          |                             |                           | HOMO $\rightarrow$ LUMO+3   | 17.83 |
| TPA-An-mPhCz | $S_1$    | 2.8304                      | HOMO $\rightarrow$ LUMO   | 98.39                       |       |
|              | $S_2$    | 3.1025                      | HOMO-1 $\rightarrow$ LUMO | 96.21                       |       |
|              | $S_3$    | 3.1876                      | HOMO-2 $\rightarrow$ LUMO | 98.39                       |       |
|              | $T_{10}$ | 3.4206                      | HOMO-4 $\rightarrow$ LUMO | 34.45                       |       |
|              |          |                             |                           | HOMO-1 $\rightarrow$ LUMO+2 | 27.92 |
|              |          |                             |                           | HOMO-2 $\rightarrow$ LUMO+2 | 30.39 |
| $T_{11}$     | 3.4610   | HOMO-2 $\rightarrow$ LUMO+3 | 11.94                     |                             |       |

**Table S8.** Spin-orbit matrices related to possible TTU transitions from  $^3(\text{TT})$  to  $\text{Sn}$  for the anthracene derivatives

| compound     | transition                                      | SOC matrix                                                          |                                                              | related molecular orbitals |
|--------------|-------------------------------------------------|---------------------------------------------------------------------|--------------------------------------------------------------|----------------------------|
| TPA-An-Ph    | $^3\text{T}_1\text{T}_1 \rightarrow \text{S}_1$ | $\langle \text{S}_1   \text{H}_{\text{so}}   \text{T}_7 \rangle$    | $\langle \text{HOMO}   \text{Hso}   \text{HOMO-2} \rangle$   | Figure S10                 |
|              |                                                 |                                                                     | $\langle \text{HOMO}   \text{Hso}   \text{HOMO-1} \rangle$   |                            |
|              |                                                 |                                                                     | $\langle \text{LUMO}   \text{Hso}   \text{LUMO+1} \rangle$   |                            |
|              |                                                 |                                                                     | $\langle \text{LUMO}   \text{Hso}   \text{LUMO+3} \rangle$   |                            |
| TPA-An-mPhCz | $^3\text{T}_1\text{T}_1 \rightarrow \text{S}_2$ | $\langle \text{S}_2   \text{H}_{\text{so}}   \text{T}_7 \rangle$    | $\langle \text{HOMO-1}   \text{Hso}   \text{HOMO-2} \rangle$ | Figure S12                 |
|              | $^3\text{T}_1\text{T}_1 \rightarrow \text{S}_1$ | $\langle \text{S}_1   \text{H}_{\text{so}}   \text{T}_{10} \rangle$ | $\langle \text{HOMO}   \text{Hso}   \text{HOMO-4} \rangle$   |                            |
|              |                                                 |                                                                     | $\langle \text{HOMO}   \text{Hso}   \text{HOMO-1} \rangle$   |                            |
|              |                                                 |                                                                     | $\langle \text{LUMO}   \text{Hso}   \text{LUMO+2} \rangle$   |                            |
|              |                                                 | $\langle \text{S}_1   \text{H}_{\text{so}}   \text{T}_{11} \rangle$ | $\langle \text{HOMO}   \text{Hso}   \text{HOMO-2} \rangle$   |                            |
|              |                                                 |                                                                     | $\langle \text{LUMO}   \text{Hso}   \text{LUMO+3} \rangle$   |                            |
|              | $^3\text{T}_1\text{T}_1 \rightarrow \text{S}_2$ | $\langle \text{S}_2   \text{H}_{\text{so}}   \text{T}_{10} \rangle$ | $\langle \text{HOMO-1}   \text{Hso}   \text{HOMO-4} \rangle$ |                            |
|              |                                                 | $\langle \text{S}_2   \text{H}_{\text{so}}   \text{T}_{11} \rangle$ | $\langle \text{HOMO-1}   \text{Hso}   \text{HOMO-2} \rangle$ |                            |
|              | $^3\text{T}_1\text{T}_1 \rightarrow \text{S}_3$ | $\langle \text{S}_3   \text{H}_{\text{so}}   \text{T}_{10} \rangle$ | $\langle \text{HOMO-2}   \text{Hso}   \text{HOMO-4} \rangle$ |                            |

#### Reference

- [1] S. Tao, Y. Zhou, C. Lee, S. Lee, D. Huang and X. Zhang, *J. Phy. Chem. C* 2008, **112**, 14603-14606.
